# Supplementary material
Source: HighWire-hosted journal article supplement (https://cmaj.ca/highwire/filestream/79479/field_highwire_adjunct_files/2/202756-res-3-at.pdf)
Supplement: 202756-res-3-at.pdf [file 202756-res-3-at.pdf]

**Appendix 3: Number of Retirement Home Outbreaks per week, Ontario, Mar 1- Dec. 18 2020 (N=770 homes)**

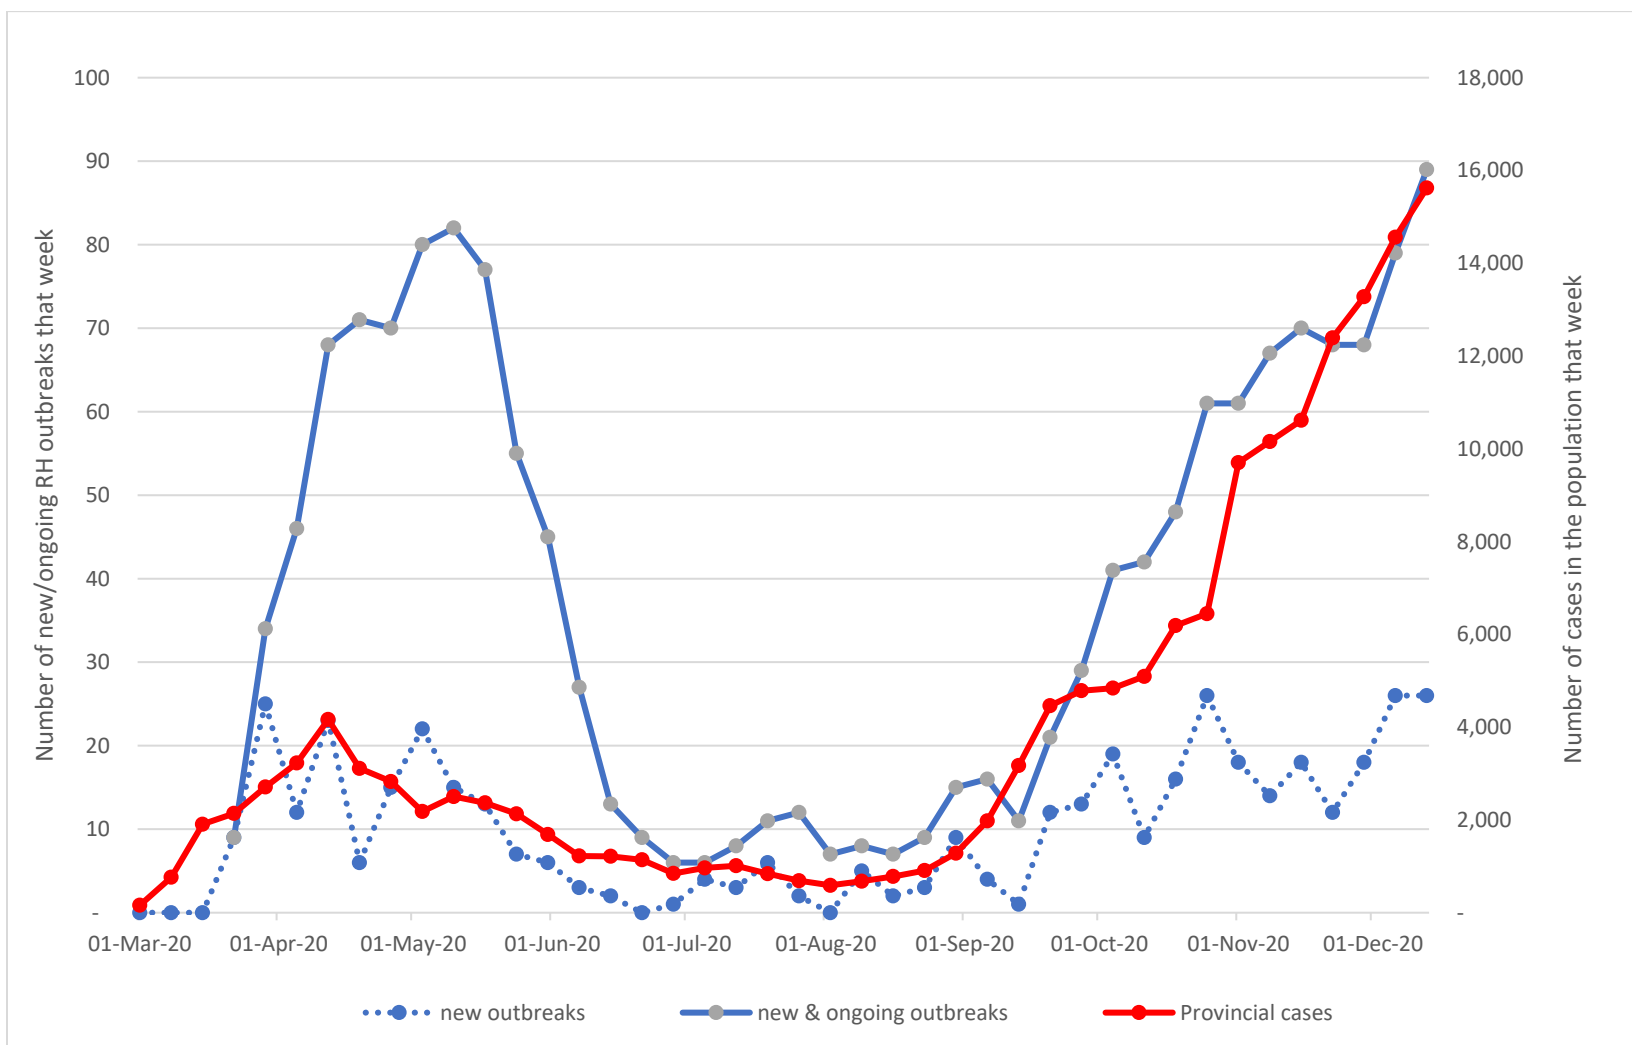

Appendix 3, as supplied by the authors. Appendix to: Costa AP, Manis DR, Jones A, et al. Risk factors for outbreaks of SARS-CoV-2 infection at retirement homes in Ontario, Canada: a population-level cohort study. *CMAJ* 2021. doi: 10.1503/cmaj.202756. Copyright © 2021 The Author(s) or their employer(s). To receive this resource in an accessible format, please contact us at [cmajgroup@cmaj.ca](mailto:cmajgroup@cmaj.ca).
